# Supplementary material
Source: PubMed Central journal article supplement (PMC8810751)
Supplement: NIHMS1739948-supplement-1.pdf [file NIHMS1739948-supplement-1.pdf]

## Supplemental Tables:

Supplemental Table 1: Participant Characteristics by Physiologic Subtype of Gestational Glucose Intolerance, Including Uncategorized.

|                                                                   | Uncategorized             | Insulin Resistant<br>GGI  | Insulin Deficient<br>GGI  | Mixed<br>Pathophysiology<br>GGI | Normal glucose<br>tolerance (NGT) | p-value <sup>^</sup> |
|-------------------------------------------------------------------|---------------------------|---------------------------|---------------------------|---------------------------------|-----------------------------------|----------------------|
| <b>N (% of GGI)</b>                                               | 11 (4.7%)                 | 115 (48.7%)               | 70 (26.6%)                | 40 (17.0%)                      | 1472                              |                      |
| <b>Participant Characteristics:</b>                               |                           |                           |                           |                                 |                                   |                      |
| <b>Age (years)</b>                                                | 31.5 (29.4, 34.9)         | 32.4 (27.8, 35.9)         | <b>34.2 (30.1, 37.3)*</b> | <b>33.4 (31.2, 36.8)*</b>       | 32.0 (28.4, 34.9)                 | 0.003                |
| <b>Nulliparous</b>                                                | 5 (45.5%)                 | 60 (52.2%)                | 41 (58.6%)                | 17 (42.5%)                      | 812 (55.2%)                       | 0.46                 |
| <b>Private insurance</b>                                          | 9 (81.8%)                 | 77 (67.0%)                | 56 (80.0%)                | 30 (75.0%)                      | 1146 (77.9%)                      | 0.02                 |
| <b>Married/Partnered</b>                                          | 8 (72.7%)                 | <b>76 (66.1%)**</b>       | 63 (90.0%)                | 35 (87.5%)                      | 1174 (79.8%)                      | <0.001               |
| <b>Race/Ethnicity:</b>                                            | **                        | **                        |                           |                                 |                                   | <0.001               |
| <i>White</i>                                                      | <b>5 (45.5%)</b>          | <b>64 (55.7%)</b>         | 54 (77.1%)                | 25 (62.5%)                      | 1043 (70.9%)                      |                      |
| <i>Latina</i>                                                     | <b>2 (18.2%)</b>          | <b>34 (29.6%)</b>         | 5 (7.1%)                  | 3 (7.5%)                        | 227 (15.4%)                       |                      |
| <i>Asian</i>                                                      | <b>3 (27.3%)</b>          | <b>7 (6.1%)</b>           | 6 (8.6%)                  | 4 (10.0%)                       | 70 (4.8%)                         |                      |
| <i>Black</i>                                                      | <b>1 (9.0%)</b>           | <b>7 (6.1%)</b>           | 1 (1.4%)                  | 3 (7.5%)                        | 65 (4.4%)                         |                      |
| <i>Other</i>                                                      | <b>0 (0%)</b>             | <b>3 (2.6%)</b>           | 4 (5.7%)                  | 5 (12.5%)                       | 67 (4.6%)                         |                      |
| <b>Maternal Characteristics at 1<sup>st</sup> Prenatal Visit:</b> |                           |                           |                           |                                 |                                   |                      |
| <b>Systolic BP (mmHg)</b>                                         | 110 (102, 110)            | 112 (110, 120)            | 110 (100, 120)            | 112 (104, 120)                  | 110 (104, 120)                    | 0.08                 |
| <b>Diastolic BP (mmHg)</b>                                        | <b>60 (60, 74)*</b>       | 70 (65, 80)               | 70 (62, 72)               | 70 (66, 74)                     | 70 (62, 74)                       | 0.03                 |
| <b>BMI (kg/m<sup>2</sup>)</b>                                     | <b>21.6 (19.7, 26.6)*</b> | <b>28.7 (24.9, 32.6)*</b> | <b>22.8 (20.8, 24.9)*</b> | <b>24.8 (23.3, 28.6)*</b>       | 24.1 (21.9, 27.4)                 | <0.001               |

|                                                 |                           |                           |                           |                        |                   |        |
|-------------------------------------------------|---------------------------|---------------------------|---------------------------|------------------------|-------------------|--------|
| <b>BMI Categories</b>                           |                           | **                        | **                        |                        |                   | <0.001 |
| <i>BMI</i> <25                                  | 8 (72.2%)                 | <b>29 (25.2%)</b>         | <b>53 (75.7%)</b>         | 21 (52.5%)             | 868 (59.0%)       |        |
| <i>BMI</i> 25-<30                               | 3 (27.3%)                 | <b>37 (32.2%)</b>         | <b>15 (21.4%)</b>         | 13 (32.5%)             | 388 (26.4%)       |        |
| <i>BMI</i> ≥30                                  | 0 (0%)                    | <b>48 (41.7%)</b>         | <b>2 (2.9%)</b>           | 6 (15.0%)              | 210 (14.3%)       |        |
| <b>Laboratory data at 16-20 Weeks Gestation</b> |                           |                           |                           |                        |                   |        |
| <b>GA at HOMA assessment (wks)</b>              | 17.3 (15.7, 18.1)         | 17.3 (16.3, 18.4)         | 16.7 (15.8, 17.9)         | 17.6 (16.2, 19.0)      | 17.1 (16.1, 18.4) | 0.19   |
| <b>Fasting glucose (mg/dL)</b>                  | <b>70* (68, 72)</b>       | <b>82 (78, 88)*</b>       | 78 (75, 82)               | <b>88 (83, 94)*</b>    | 78 (74, 82)       | <0.001 |
| <b>Fasting insulin (uIU/mL)</b>                 | <b>24.4 (22.0, 25.8)*</b> | <b>52.4 (39.8, 77.2)*</b> | <b>16.9 (14.8, 20.5)*</b> | 28.8 (27.1, 35.0)      | 31.0 (20.3, 46.2) | <0.001 |
| <b>Additional Pregnancy data:</b>               |                           |                           |                           |                        |                   |        |
| <b>Glucose loading test (mg/dL)</b>             | <b>155* (144, 166)</b>    | <b>152 (145, 164)*</b>    | <b>155 (146, 165)*</b>    | <b>155 (147, 170)*</b> | 108 (94, 120)     | <0.001 |
| <b>GDM diagnosis</b>                            | 3 (27.3%)                 | 16 (13.9%)                | 6 (8.6%)                  | 3 (7.5%)               | --                | 0.22   |
| <b>Gestational weight gain (lbs)</b>            | 27 (18, 35)               | 28 (19, 36)               | 29 (22, 32)               | 28.5 (21, 35)          | 30 (23, 36)       | 0.12   |
| <b>GA at delivery (wks)</b>                     | 39.1 (38.4, 40.1)         | 39.3 (38.3, 40.3)         | 39.9 (38.9, 40.7)         | 39.5 (38.35, 40.15)    | 39.7 (38.9, 40.6) | 0.06   |

Data in N (%) or median (IQR). ^P values were determined by Fisher's exact test or Pearson chi-square tests for categorical variables or Kruskal-Wallis tests for continuous variables. Bold and \* indicates Dunn test results  $p < 0.05$  when compared to Normal Glucose Tolerance (NGT). For race/ethnicity, marital status, and BMI categories: bold and \*\* indicates post-hoc Chi-square results  $p < 0.017$  (adjusting for three comparisons) when group compared to NGT. Abbreviations: GGI, gestational glucose intolerance defined as glucose loading test (GLT)  $\geq 140$ mg/dl. GA, gestational age. Glucose and GLT result measured in mg/dl. BP, blood pressure. BMI, body mass index. GDM, gestational diabetes diagnosis by National Diabetes Data Group (NDDG) criteria. Gestational weight gain measured by subtracting weight at first prenatal visit from weight at last prenatal visit.

Supplemental Table 2: Risk of Adverse Pregnancy Outcomes by Alternative Gestational Glucose Intolerance Physiologic Subtype.

| Outcomes                                              | Model      | Insulin Resistant GGI<br>OR (95% CI) or $\beta$ (95% CI)<br>N = 86 | p-value          | Insulin Deficient GGI<br>OR (95% CI) or $\beta$ (95% CI)<br>N = 52 | p-value      | Mixed Pathophysiology<br>GGI<br>OR (95% CI) or $\beta$ (95% CI)<br>N = 1 | p-value | Normal<br>Glucose<br>Tolerance<br>(NGT)<br>N = 1472 |
|-------------------------------------------------------|------------|--------------------------------------------------------------------|------------------|--------------------------------------------------------------------|--------------|--------------------------------------------------------------------------|---------|-----------------------------------------------------|
| <b>Primary Outcome</b>                                |            |                                                                    |                  |                                                                    |              |                                                                          |         |                                                     |
| <b>Large for Gestational Age (LGA)</b>                | Unadjusted | <b>3.27 (1.96, 5.48)</b>                                           | <b>&lt;0.001</b> | 1.55 (0.68, 3.51)                                                  | 0.30         | --                                                                       | --      | Ref                                                 |
|                                                       | Adjusted*  | <b>2.38 (1.35, 4.19)</b>                                           | <b>0.003</b>     | 1.65 (0.71, 3.81)                                                  | 0.24         | --                                                                       | --      | Ref                                                 |
| <b>Secondary Infant Outcomes</b>                      |            |                                                                    |                  |                                                                    |              |                                                                          |         |                                                     |
| <b>Birthweight percentile (BW%)</b>                   | Unadjusted | <b><math>\beta</math> = 9.45 (3.33, 15.57)</b>                     | <b>0.003</b>     | $\beta$ = 1.33 (-6.48, 9.14)                                       | 0.74         | $\beta$ = 48.3 (-6.50, 103.0)                                            | 0.08    | Ref                                                 |
|                                                       | Adjusted*  | <b><math>\beta</math> = 6.54 (0.36, 12.72)</b>                     | <b>0.04</b>      | $\beta$ = 1.15 (-6.51, 8.81)                                       | 0.76         | $\beta$ = 49.9 (-3.62, 103.5)                                            | 0.07    | Ref                                                 |
| <b>Neonatal Intensive Care Unit (NICU) admission</b>  | Unadjusted | 1.79 (0.74, 4.32)                                                  | 0.20             | 0.53 (0.07, 3.96)                                                  | 0.54         | --                                                                       | --      | Ref                                                 |
|                                                       | Adjusted   | 1.22 (0.47, 3.22)                                                  | 0.68             | 0.48 (0.06, 3.62)                                                  | 0.47         | --                                                                       | --      | Ref                                                 |
| <b>Secondary Maternal Outcomes</b>                    |            |                                                                    |                  |                                                                    |              |                                                                          |         |                                                     |
| <b>Pregnancy-related Hypertension</b>                 | Unadjusted | <b>1.99 (1.15, 3.46)</b>                                           | <b>0.02</b>      | 1.85 (0.94, 3.64)                                                  | 0.08         | --                                                                       | --      | Ref                                                 |
|                                                       | Adjusted   | 1.39 (0.78, 2.54)                                                  | 0.30             | <b>2.03 ( 1.01, 4.05)</b>                                          | <b>0.046</b> | --                                                                       | --      | Ref                                                 |
| <b>Cesarean delivery rate among nulliparous women</b> | Unadjusted | 0.90 (0.45, 1.80)                                                  | 0.77             | 1.11 (0.51, 2.42)                                                  | 0.80         | --                                                                       | --      | Ref                                                 |
|                                                       | Adjusted   | 0.61 (0.29, 1.26)                                                  | 0.18             | 1.09 (0.49, 2.43)                                                  | 0.83         | --                                                                       | --      | Ref                                                 |

In contrast to Table 2 in the main text of the manuscript where women were categorized based on a 50<sup>th</sup> percentile cut-off (with percentiles defined in women with glucose loading test [GLT] results <130 mg/dl), in this table, women were categorized based on the 25<sup>th</sup> percentile cut-off, which results in more uncategorized women and less informative gestational glucose intolerance (GGI) subtyping. Bold odds ratios (OR) and p values indicate statistical significance with  $p < 0.05$ . LGA: large for gestational age. BW%: birthweight percentile - beta coefficient from linear regression model shown. NICU: neonatal intensive care unit. Ref: referent group. OR's shown from logistic regression models or beta coefficient from linear regression models (BW%). Regression models were adjusted for the following covariates including age, race/ethnicity, marital status, and BMI at <20 weeks gestation. For LGA and BW% models (\*), infant sex was added as a covariate.

**Supplemental Table 3: Risk of Adverse Pregnancy Outcomes by Gestational Glucose Intolerance Physiologic Subtype Compared to Women with Glucose Loading Test Results Less than 130 mg/dl.**

| Outcomes                                                  | Model      | Insulin Resistant<br>GGI<br>OR (95% CI) or $\beta$<br>(95% CI)<br>N = 115 | p-value          | Insulin Deficient<br>GGI<br>OR (95% CI) or $\beta$<br>(95% CI)<br>N = 70 | p-value     | Mixed<br>Pathophysiology GGI<br>OR (95% CI) or $\beta$<br>(95% CI)<br>N = 40 | p-value     | GLT<130<br>mg/dl<br>N = 1311 |
|-----------------------------------------------------------|------------|---------------------------------------------------------------------------|------------------|--------------------------------------------------------------------------|-------------|------------------------------------------------------------------------------|-------------|------------------------------|
| <b>Primary Outcome</b>                                    |            |                                                                           |                  |                                                                          |             |                                                                              |             |                              |
| <b>Large for Gestational Age<br/>(LGA)</b>                | Unadjusted | <b>2.57 (1.57, 4.23)</b>                                                  | <b>&lt;0.001</b> | 1.74 (0.87, 3.50)                                                        | 0.12        | 1.87 (0.77, 4.56)                                                            | 0.17        | Ref                          |
|                                                           | Adjusted*  | <b>1.87 (1.09, 3.19)</b>                                                  | <b>0.02</b>      | <b>2.19 (1.07, 4.49)</b>                                                 | <b>0.03</b> | 1.80 (0.71, 4.53)                                                            | 0.21        | Ref                          |
| <b>Secondary Infant Outcomes</b>                          |            |                                                                           |                  |                                                                          |             |                                                                              |             |                              |
| <b>Birthweight percentile<br/>(BW%)</b>                   | Unadjusted | <b><math>\beta</math> = 6.87 (1.48, 12.25)</b>                            | <b>0.01</b>      | $\beta$ = 1.11 (-5.70, 7.90)                                             | 0.75        | <b><math>\beta</math> = 9.36 (0.48, 18.2)</b>                                | <b>0.04</b> | Ref                          |
|                                                           | Adjusted*  | $\beta$ = 3.81 (-1.64, 9.25)                                              | 0.17             | $\beta$ = 2.44 (-4.24, 9.11)                                             | 0.47        | $\beta$ = 7.90 (-0.80, 16.6)                                                 | 0.08        | Ref                          |
| <b>Neonatal Intensive Care<br/>Unit (NICU) admission</b>  | Unadjusted | <b>2.24 (1.06, 4.74)</b>                                                  | <b>0.04</b>      | 0.42 (0.06, 3.14)                                                        | 0.40        | 1.60 (0.37, 6.95)                                                            | 0.53        | Ref                          |
|                                                           | Adjusted   | 1.96 (0.87, 4.43)                                                         | 0.11             | 0.37 (0.05, 2.77)                                                        | 0.33        | 1.18 (0.27, 5.19)                                                            | 0.83        | Ref                          |
| <b>Secondary Maternal Outcomes</b>                        |            |                                                                           |                  |                                                                          |             |                                                                              |             |                              |
| <b>Pregnancy-related<br/>Hypertension</b>                 | Unadjusted | <b>2.20 (1.38, 3.52)</b>                                                  | <b>0.001</b>     | 0.93 (0.45, 1.93)                                                        | 0.85        | 1.25 (0.54, 2.90)                                                            | 0.60        | Ref                          |
|                                                           | Adjusted   | <b>1.81 (1.09, 3.00)</b>                                                  | <b>0.02</b>      | 1.06 (0.51, 2.21)                                                        | 0.89        | 1.12 (0.47, 2.65)                                                            | 0.80        | Ref                          |
| <b>Cesarean delivery rate<br/>among nulliparous women</b> | Unadjusted | 1.14 (0.66, 1.99)                                                         | 0.64             | 1.02 (0.52, 2.01)                                                        | 0.95        | 1.16 (0.42, 3.17)                                                            | 0.78        | Ref                          |
|                                                           | Adjusted   | 0.80 (0.44, 1.45)                                                         | 0.96             | 1.02 (0.51, 2.05)                                                        | 0.80        | 1.14 (0.41, 3.18)                                                            | 0.80        | Ref                          |

In contrast to Table 2 in the main text of the manuscript, the reference group in this table contains women with a glucose loading test (GLT) result of  $< 130\text{mg/dL}$ . Bold odds ratios (OR) and p values indicate statistical significance with  $p < 0.05$ . GGI: gestational glucose intolerance. LGA: large for gestational age. BW%: birthweight percentile - beta coefficient from linear regression model shown. NICU: neonatal intensive care unit. Ref: referent group. OR's shown from logistic regression models or beta coefficient from linear regression models (BW%). Regression models were adjusted for the following covariates including age, race/ethnicity, marital status, and BMI at  $<20$  weeks gestation. For LGA and BW% models (\*), infant sex was added as a covariate.
